# Supplementary material for: The BAG2 and BAG6 Genes Are Involved in Multiple Abiotic Stress Tolerances in Arabidopsis Thaliana
Source: MDPI journal article supplement (doi:10.3390/ijms22115856), 2021-05-29
Supplement: s1 [file s1]

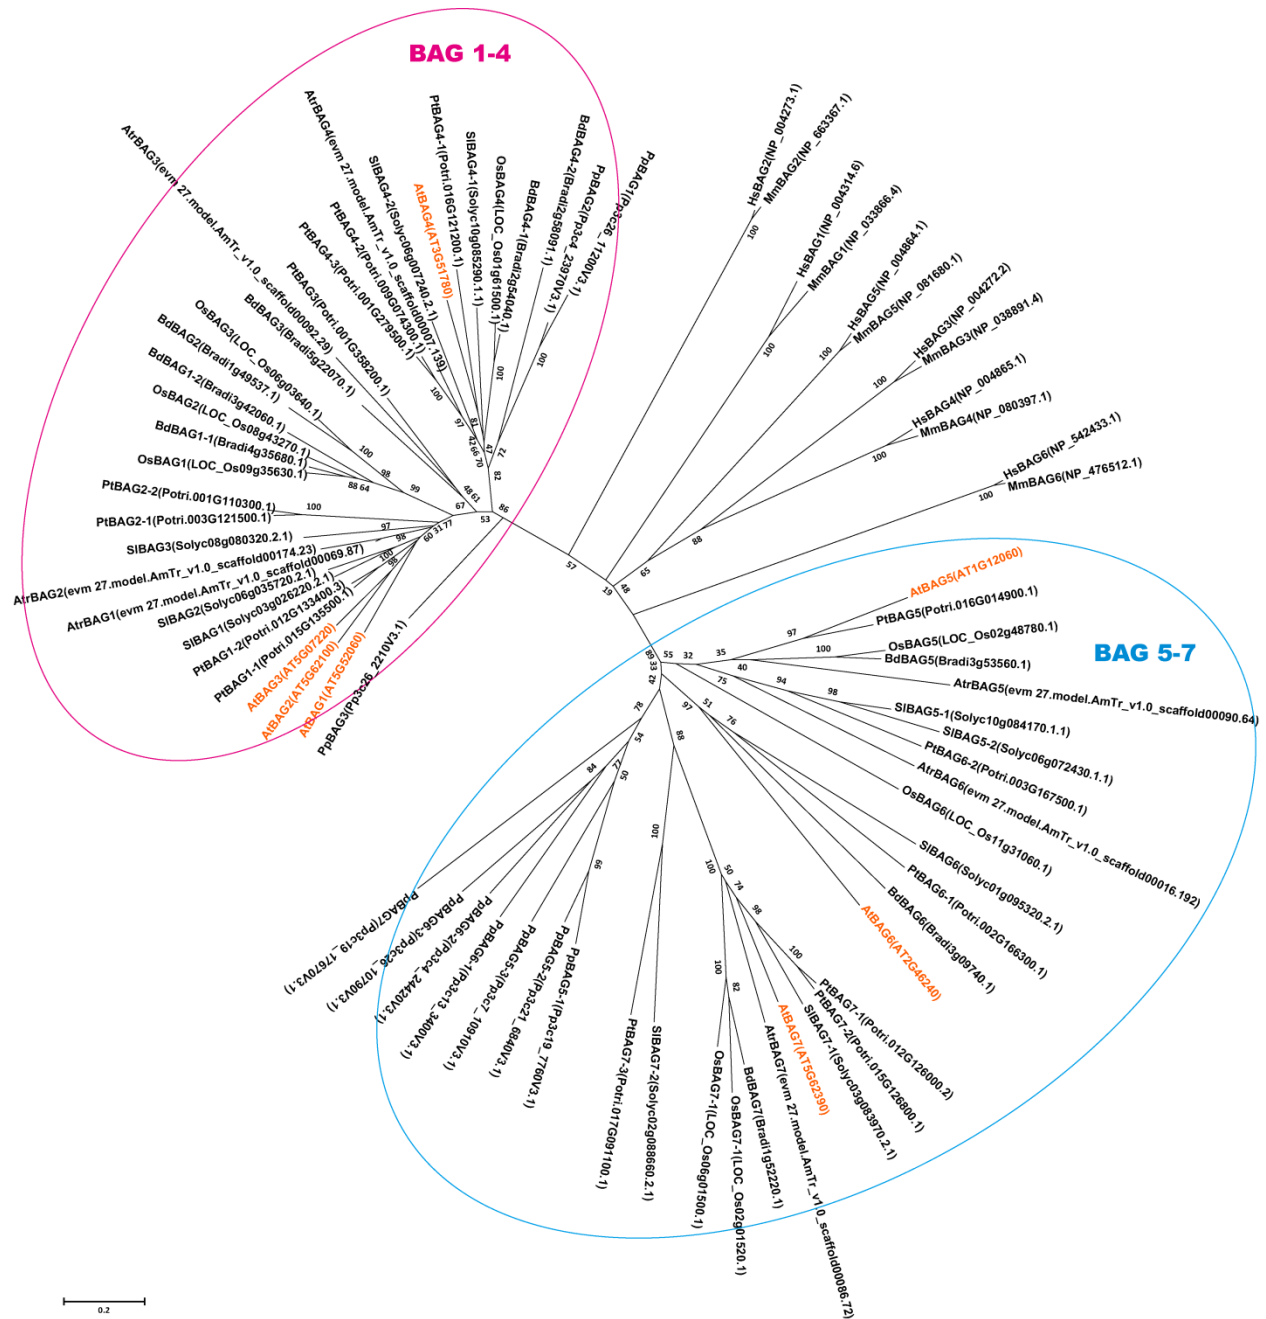

**Figure S1.** Phylogenetic analysis of BAG proteins in *Physcomitrella patens* (Pp), *Amborella trichopoda* (Atr), *Oryza sativa* (Os), *Brachypodium distachyon* (Bd), *Solanum lycopersicum* (Sl), *Populus trichocarpa* (Pt), *Arabidopsis thaliana* (At), *Homo sapiens* (Hs), and *Mus musculus* (Mm) by using the MEGA7 software.

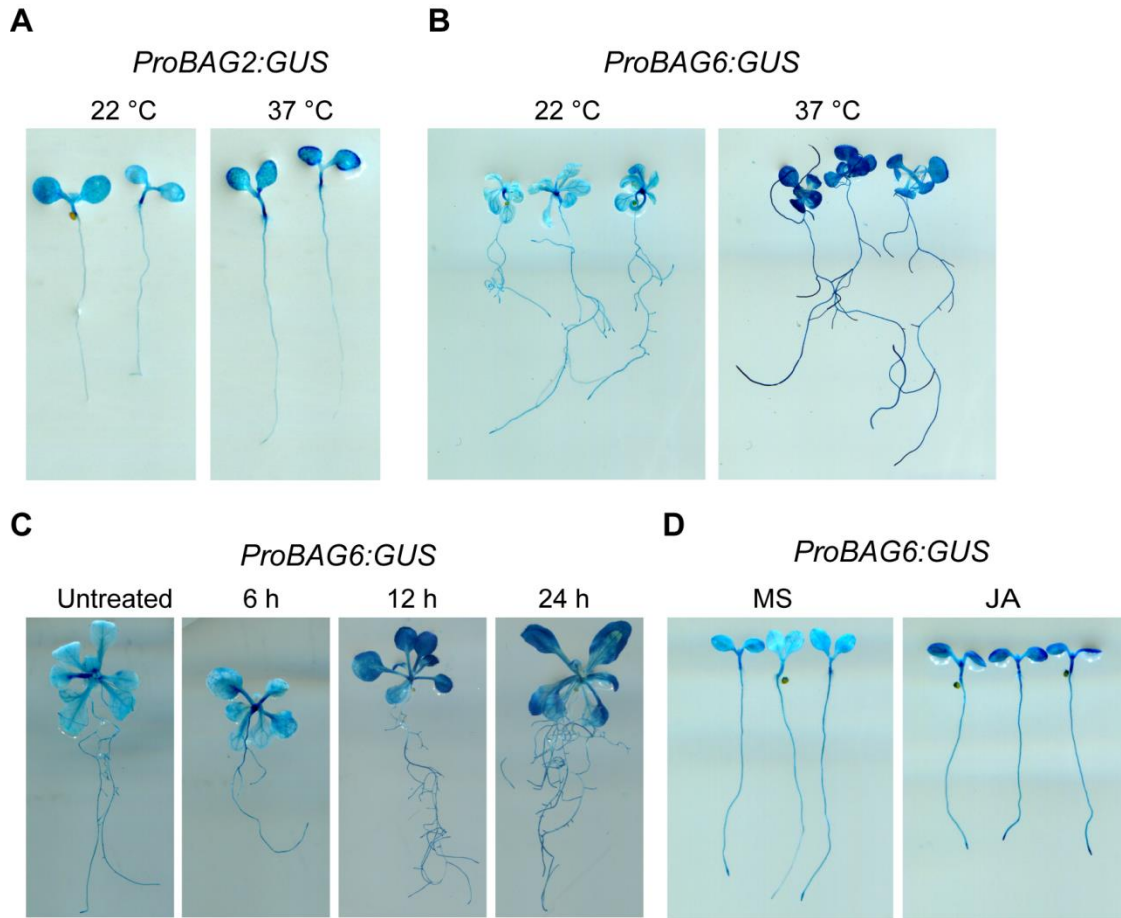

**Figure S2.** Histochemical GUS staining of *ProBAG2:GUS* and *ProBAG6:GUS* seedlings under a normal growth condition (22 °C) and after heat stress (37 °C), mannitol and jasmonic acid (JA) treatment. **A** and **B** GUS staining of 7-day-old *ProBAG2:GUS* and 12-day-old *ProBAG6:GUS* seedlings grown under a normal growth condition (22 °C) or after heat stress (37 °C) for 2 h. **C** GUS staining of 2-week-old *ProBAG6:GUS* transgenic plants treated without or with 300 mM mannitol for 6 h, 12 h and 24 h. **D** GUS staining of 7-day-old *ProBAG6:GUS* seedlings treated without or with 10 μM JA. Shown are representative images of three independent experiments.

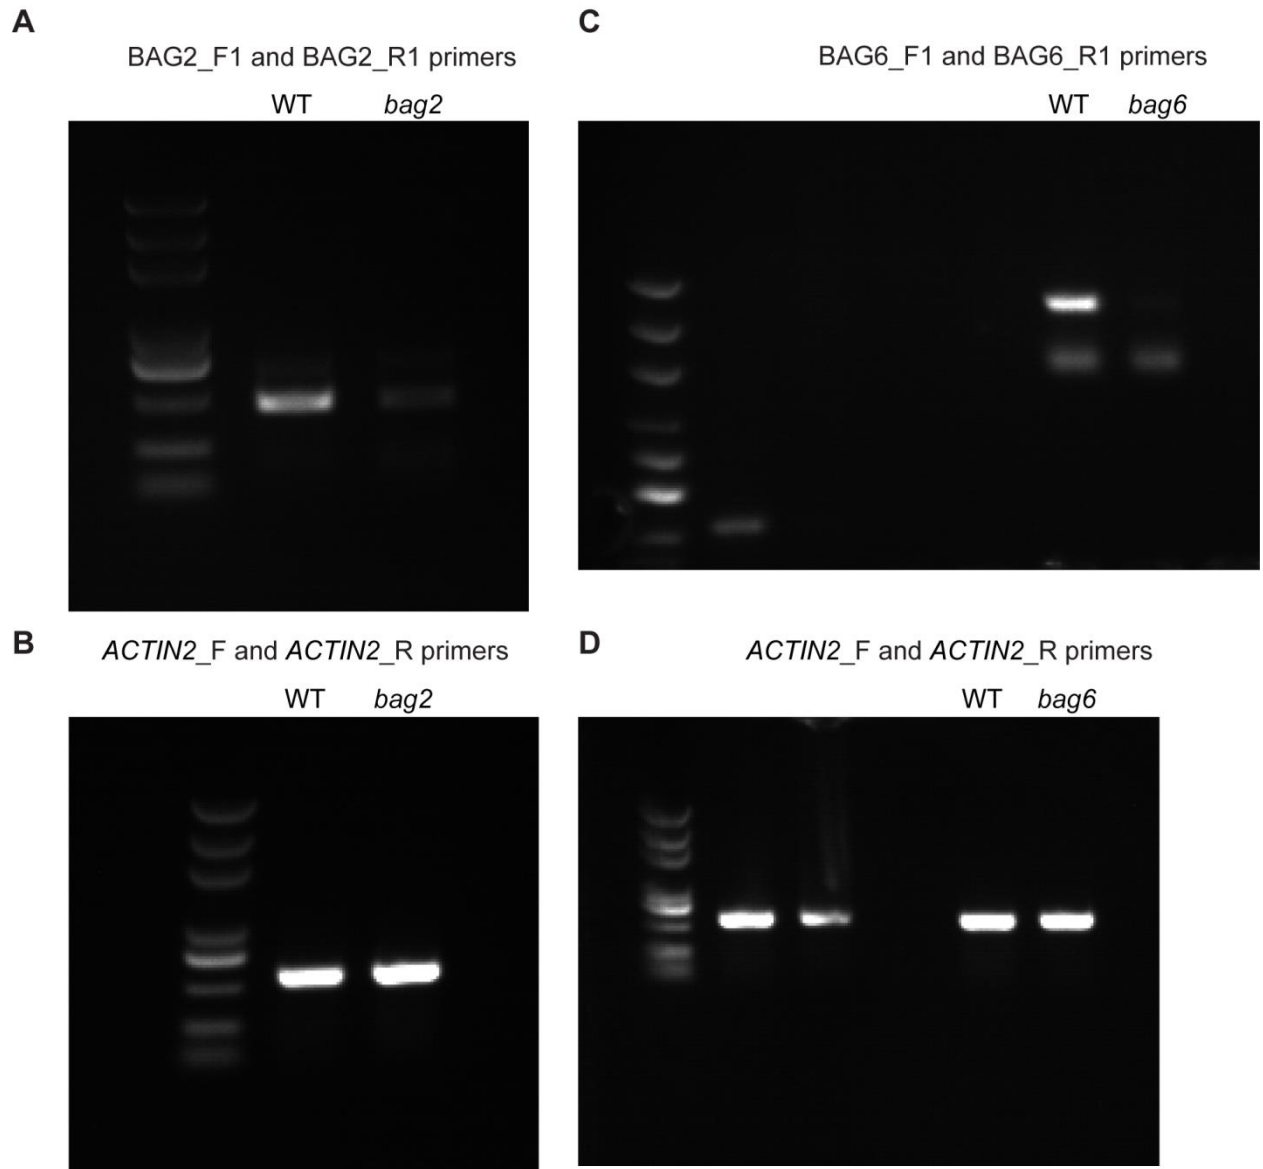

**Figures S3.** Transcription analysis of the *bag2* and *bag6* mutants.

**a** and **b** RT-PCR analysis of transcription levels of the *AtBAG2* (a) and the *ACTIN2* (b) genes in WT and the *bag2* mutants. **c** and **d** RT-PCR analysis of transcription levels of the *AtBAG6* (c) and the *ACTIN2* (d) genes in WT and the *bag6* mutants.

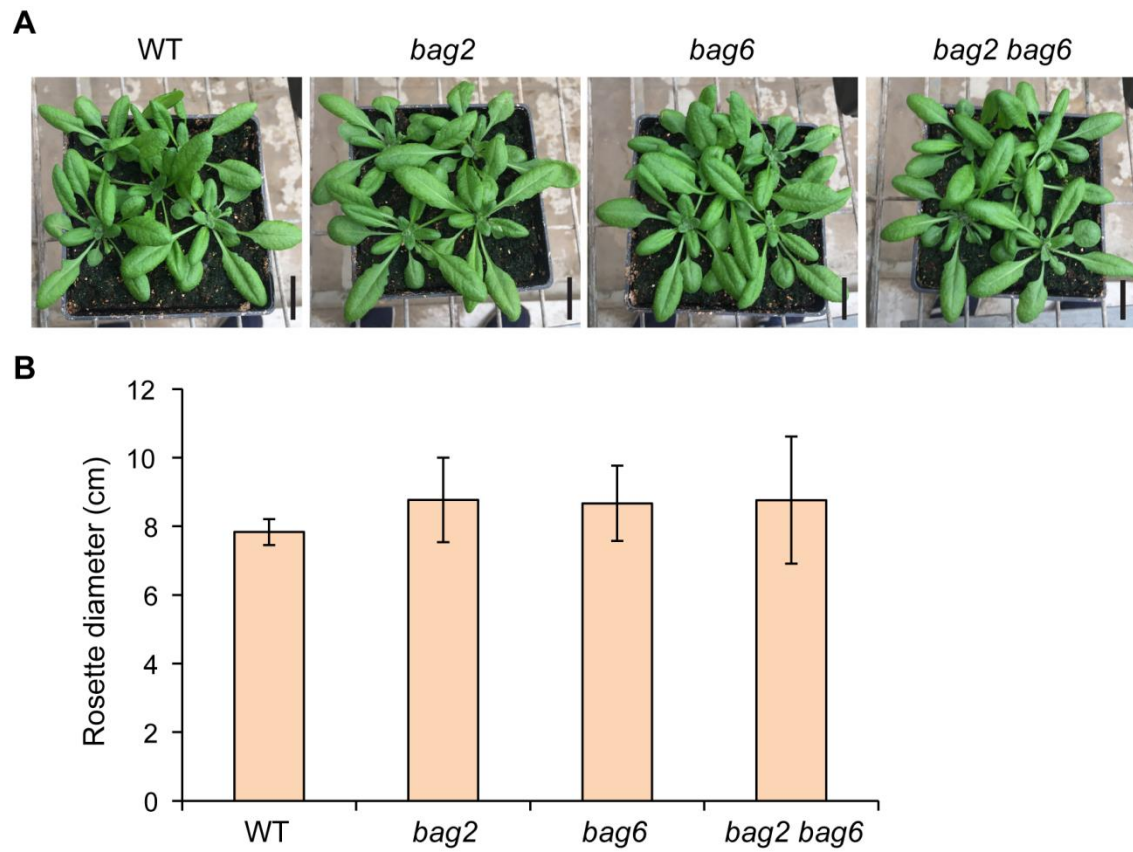

**Figure S4.** Phenotypes (A) and rosette diameter (B) of 4-week-old wild-type (WT), *bag2*, *bag6*, and *bag2 bag6* plants grown under a normal condition.

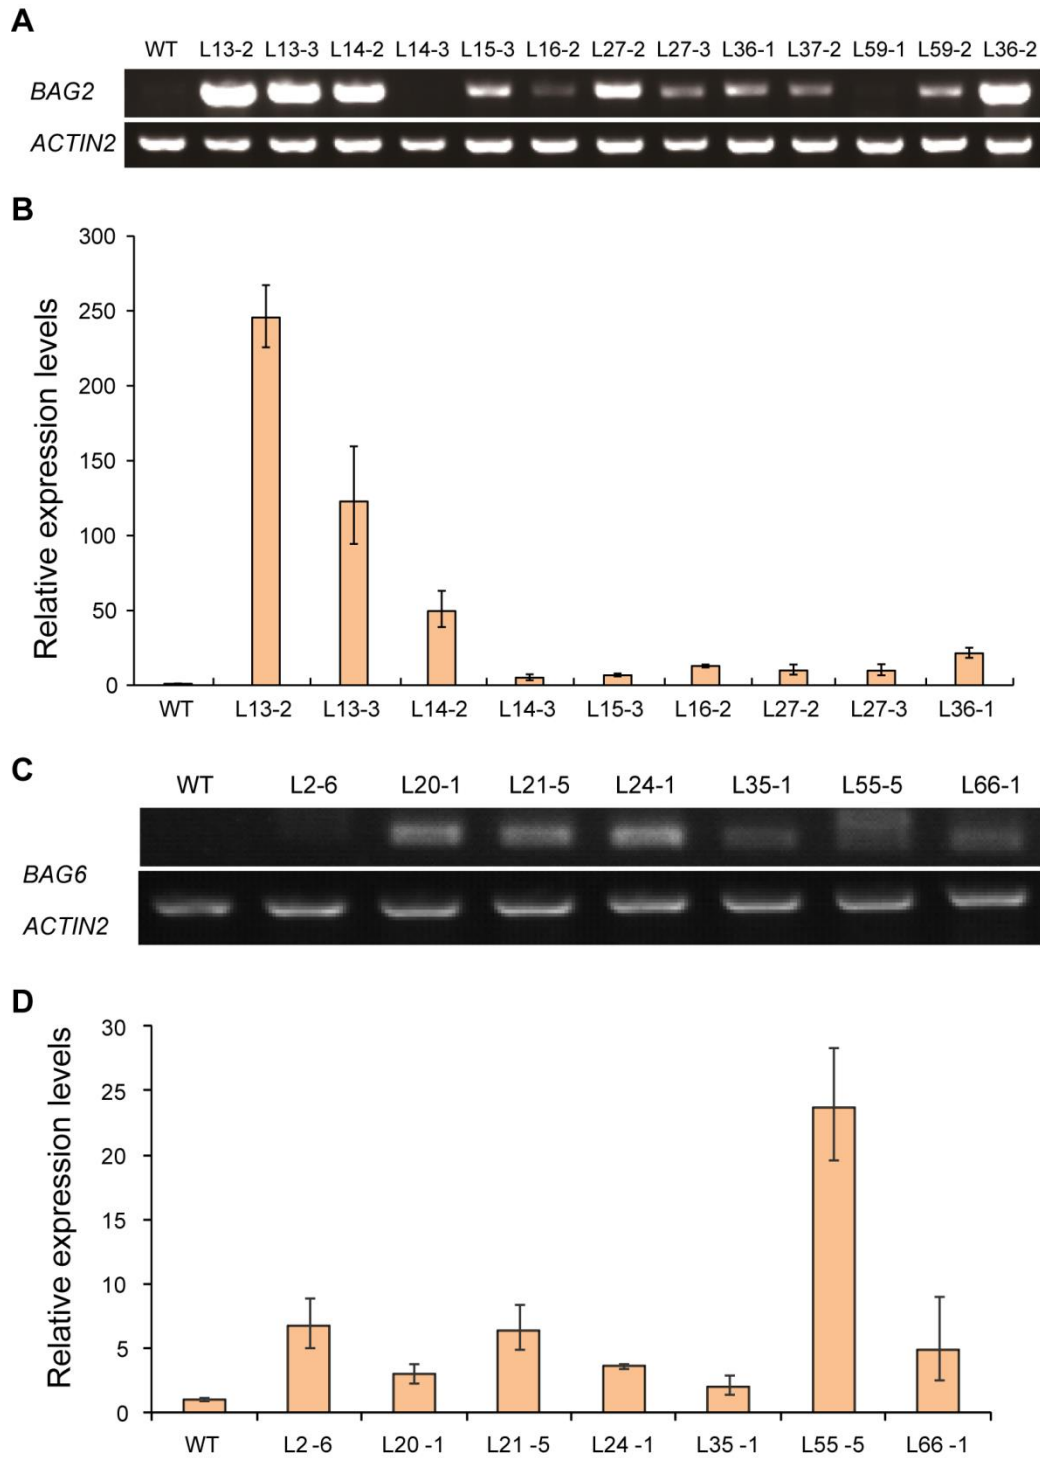

**Figure S5.** Transcription analysis of *AtBAG2* and *AtBAG6* overexpression lines. Three-week-old Arabidopsis rosette leaves were collected for RT-PCR (A, C) and RT-qPCR (B, D) to check the transcription levels of the *AtBAG2* and *AtBAG6* genes in WT and *AtBAG2* and *AtBAG6* overexpression transgenic lines.

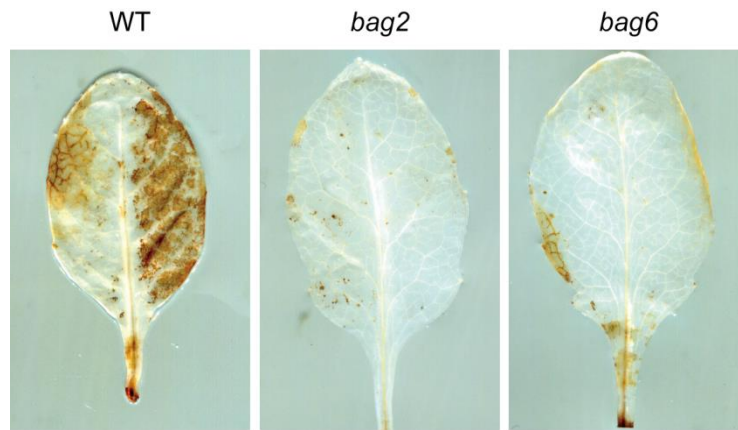

**Figure S6.** DAB staining of H<sub>2</sub>O<sub>2</sub> accumulation in leaves from WT, *bag2* and *bag6* plants after two weeks drought treatment.

**Table S1.** List of Primers used in this study.

| Name    | Sequence (5'–3')         | Application                   |
|---------|--------------------------|-------------------------------|
| LBa1    | TGGTTCACGTAGTGGGCCATC    | T-DNA specific primer         |
| BAG2_F1 | GGAGGGAAAGTTGAAGAGAAGA   | Genotyping <i>bag2</i> mutant |
| BAG2_R1 | TGCTGGATGTTGACGACATGTT   |                               |
| BAG6_F1 | CGAGAATGATCTGGAGAGCAG    | Genotyping <i>bag6</i> mutant |
| BAG6_R1 | GCTGGTTATAGCTTCCCTAACC   |                               |
| BAG2_F1 | GGAGGGAAAGTTGAAGAGAAGA   | RT-PCR                        |
| BAG2_R2 | CGACCAATCACAAATCATATACA  |                               |
| BAG6_F3 | GCCTGTGTACATGGATCCATC    |                               |
| BAG6_R1 | GCTGGTTATAGCTTCCCTAACC   |                               |
| ACT2_F  | TGGGATGAACCAGAAGGATG     | RT-PCR reference              |
| ACT2_R  | AAGAATACCTCTCTTGGATTGTGC |                               |
| RD29A_F | GAAGATGATGATGATGACGAGC   | RT-qPCR                       |
| RD29A_R | TCAGTGGGTTTGGTGTAATCG    |                               |
| RD29B_F | AGCAAGACCCAGAAGTTCAC     |                               |
| RD29B_R | AACAATCTCCTCCGATGC       |                               |
| NCED3_F | ACAGCCTCGTCCCTAAGTCT     |                               |
| NCED3_R | GCCCTCCCTCCTAAAGTGAC     |                               |
| ABI4-F  | ACTCCAAGTCCGTTACCGTG     |                               |
| ABI4-R  | GGGGTTAAGTTGAGCTGAGCA    |                               |
| BAG2_qF | TTGAAGAAGAAGATGCAGGAGGAA |                               |
| BAG2_qR | CCTTGACGCCTCCTCGTAAA     |                               |
| BAG6-qF | CCTGGCAACGGATTCTAAGC     |                               |
| BAG6-qR | GGAATTGTTGTCGAGGAAGC     |                               |

|           |                           |                            |
|-----------|---------------------------|----------------------------|
| TIP41_qF  | GTATGAAGATGAACTGGCTGACAAT | RT-qPCR reference          |
| TIP41_qR  | ATCAACTCTCAGCCAAAATCGCAAG |                            |
| BAG2_F4_p | CGACACAAATGTCCACCTTTA     | <i>ProBAG2:GUS</i> cloning |
| BAG2_R4_p | TTCTTTATTAAGAGAGATAGAGAG  |                            |
| BAG6_F4_p | TGGATATAAACAAGAGCACTGAT   | <i>ProBAG6:GUS</i> cloning |
| BAG6_R4_p | CTTTAATCAAGATCACTTAACCAA  |                            |
